# Supplementary material for: Enhancing Cystic Fibrosis Immune Regulation
Source: Frontiers journal article supplement (doi:10.3389/fphar.2021.573065), 2021-05-13
Supplement: Data_Sheet_1.pdf [file Data_Sheet_1.pdf]

## **Supplemental Data**

**Table S1A: Survival Data for Transplant Efficiency and Sex Differences.**

**Table S1B: Histological Point-Counting for Inflammation on Sex Differences in the Transplant Process.**

**Table S2A: BAL fluid cell numbers three months following irradiation and bone marrow reconstitution using female donors into male recipients.**

**Table S2B: BAL fluid cell numbers three months following irradiation and bone marrow reconstitution using male donors into female recipients**

**Supplemental Table S1A. Survival Rate of Female and Male Transplantation Efficiency**

| Experiment ID | BM donor      | BM recipient (male) | Survival rate (N)* |
|---------------|---------------|---------------------|--------------------|
| 1             | Female B6     | B6                  | 66.7% (6)          |
| 2             | Female mix-CF | B6                  | 70.0% (30)         |
| 3             | Female mix-CF | B6                  | 88.5% (26)         |
| 4             | Female mix-CF | B6                  | 83.3% (6)          |
| 5             | Female B6     | mix-CF              | 80.0% (30)         |
| 6             | Female B6     | mix-CF              | 75.0% (24)         |
| 7             | Female B6     | mix-CF              | 100.0% (6)         |
| 8             | Female mix-CF | mix-CF              | 100.0% (6)         |
| 9             | Male B6       | B6                  | 73.3% (15)         |
| 10            | Male B6       | B6                  | 66.7% (9)          |
| 11            | Male mix-CF   | B6                  | 91.7% (12)         |
| 12            | Male mix-CF   | B6                  | 50.0% (6)          |
| 13            | Male B6       | mix-CF              | 86.7% (15)         |
| 14            | Male B6       | mix-CF              | 87.5% (8)          |
| 15            | Male mix-CF   | mix-CF              | 64.3% (14)         |
| 16            | Male mix-CF   | mix-CF              | 87.5% (8)          |

\*Logistic regression model was used to test the effect of group on survival while adjusting for experiment, which was not significant for female or male donors ( $P = 0.96$  and  $0.59$ , respectively)

**Table S1B. Lung Inflammation Score**

| BM Donor  | BM recipient | N | Left lung     | Right lung    |
|-----------|--------------|---|---------------|---------------|
| female CF | male CF      | 6 | $1.0 \pm 0.0$ | $1.2 \pm 0.4$ |
| female B6 | male CF      | 6 | $1.2 \pm 1.2$ | $0.7 \pm 0.5$ |
| female CF | male B6      | 5 | $0.8 \pm 0.8$ | $1.2 \pm 0.8$ |
| female B6 | male B6      | 4 | $0.3 \pm 0.5$ | $0.8 \pm 0.5$ |

BM = bone marrow

There were no significant differences in lung inflammation between the groups (Kruskal-Wallis test;  $P > 0.05$ )

**Table S2A. BAL Leukocyte and Cell Types Post-Transplantation (Female Donors/Male Recipients).**

| Group<br>N                    | B6 → B6<br>4 | mix.CF → B6<br>5 | B6 → mix.CF<br>6 | mix.CF → mix.CF<br>6 |
|-------------------------------|--------------|------------------|------------------|----------------------|
| 10 <sup>3</sup> Leukocytes/ml | 46 ± 13      | 78 ± 40          | 155 ± 139        | 118 ± 96             |
| 10 <sup>3</sup> AM/ml         | 42 ± 11      | 71 ± 36          | 143 ± 123        | 110 ± 93             |
| 10 <sup>3</sup> PMN/ml        | 1 ± 1        | 1 ± 1            | 1 ± 1            | 4 ± 3                |
| 10 <sup>3</sup> Lymph/ml      | 2 ± 3        | 4 ± 5            | 11 ± 18          | 4 ± 2                |
| %AM                           | 93 ± 5       | 92 ± 3           | 94 ± 4           | 92 ± 4               |
| %PMN*                         | 2 ± 1        | 1 ± 1            | 1 ± 1†           | 4 ± 3                |
| %Lymph                        | 6 ± 4        | 7 ± 3            | 6 ± 4            | 5 ± 3                |

AM = alveolar macrophages

PMN = polymorphonuclear neutrophils

Lymph = lymphocytes

\*Significantly different among the four groups using the exact Kruskal-Wallis test (P = 0.0163)

†Significantly different from mix.CF → mix.CF mice (P = 0.0077) using the Wilcoxon rank sum test when making pairwise comparisons

**Table S2B. BAL Leukocytes and Cell Types Post- Transplantation (Male Donor/Female Recipient)**

| Group<br>N                    | B6 → B6<br>6 | mix-CF → B6<br>3 | B6 → mix-CF<br>7 | mix-CF → mix-CF<br>7 |
|-------------------------------|--------------|------------------|------------------|----------------------|
| 10 <sup>3</sup> Leukocytes/ml | 49 ± 13      | 52 ± 31          | 49 ± 14          | 70 ± 30              |
| 10 <sup>3</sup> AM/ml         | 41 ± 7       | 49 ± 8           | 46 ± 14          | 64 ± 32              |
| 10 <sup>3</sup> PMN/ml        | 1 ± 1        | 1 ± 1            | 1 ± 1            | 5 ± 4                |
| 10 <sup>3</sup> Lymph/ml      | 8 ± 8        | 3 ± 2            | 1 ± 1            | 1 ± 2                |
| %AM                           | 85 ± 12      | 94 ± 2           | 95 ± 2           | 89 ± 8               |
| %PMN                          | 2 ± 2        | 2 ± 1            | 2 ± 2            | 9 ± 8                |
| %Lymph*                       | 13 ± 12      | 5 ± 1            | 3 ± 2            | 2 ± 2                |

AM = alveolar macrophages

PMN = polymorphonuclear neutrophils

Lymph = lymphocytes

\*Significantly different among the four groups using the exact Kruskal-Wallis test (P = 0.0168), but not significantly different when making pairwise comparisons using the Wilcoxon rank sum test where P = 0.0083 was considered significant.
